# Supplementary material
Source: PubMed Central journal article supplement (PMC3084115)
Supplement: 1102030108_pnas.201102030SI.pdf [file 1102030108_pnas.201102030SI.pdf]

# Supporting Information

Young et al. 10.1073/pnas.1102030108

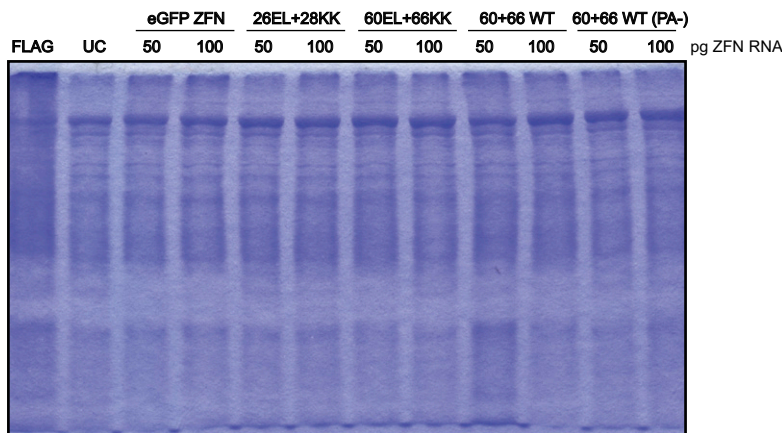

**Fig. S1.** Loading control for ZFN Western blot. Coomassie stained gel of lysates used for detecting FLAG-tagged ZFNs by Western blotting. EL+KK, ZFNs with the EL and KK modifications in the FokI domain (1); numbers represent different noggin ZFN pairs (Table S1).

1. Miller JC, et al. (2007) An improved zinc-finger nuclease architecture for highly specific genome editing. *Nat Biotechnol* 25:778–785.

**Table S1. Noggin ZFN target sites and amino acid sequences of designed zinc-finger recognition helices**

| Noggin ZFN-binding sequence (underlined)           | ZFN     | Finger 1 | Finger 2 | Finger 3 | Finger 4 | Finger 5 | Finger 6 |
|----------------------------------------------------|---------|----------|----------|----------|----------|----------|----------|
| AGCATCCGGATCCTAtctat <u>GATCCCAAGGAGAAG</u>        | 25729KK | RSDNLSV  | RSANLTR  | RSDNLSV  | IRSTLRD  | TSSNLSR  |          |
| TCGTAGGCCTAGGATagataCTAGGGTTCCTCTTC                | 25728EL | QSSDLSR  | TSANLSR  | RSDLTSE  | TSANLSR  | RSDYLTK  |          |
| ATCCGGATCCTATCTatgat <u>CCCAAGGAGAAGGAT</u>        | 25731KK | TSSNLSR  | RSDNLSV  | RSANLTR  | RSDNLSV  | IRSTLRD  |          |
| TAGGCCTAGGATAGataactaGGGTTCCTCTCCTA                | 25730EL | TSSNLSR  | RSDLTSE  | TSANLSR  | RSDYLST  | QNAHRKT  |          |
| CTTATTgAGCATCCGGATCctatc <u>TATGATCCCAAGGAGAAG</u> | 15026EL | RSDNLSV  | RSANLTR  | RSDNLSV  | DNRDRIK  | QSSNLAR  | TSSNRKT  |
| GAATAAcTCGTAGGCCTAGgatagATACTAGGGTTCCTCTTC         | 15028KK | RSDALST  | ASSNRKT  | QSSDLSR  | TSANLSR  | RSDLTSE  | TSANLSR  |
| CTTATTgAGCATCCGGATCctatc <u>TATGATCCCAAGGAGAAG</u> | 25766KK | RSDNLSV  | RSANLTR  | RSDNLSV  | IRSTLRD  | TSGNLTR  | NRGNLVT  |
| GAATAAcTCGTAGGCCTAGgatagATACTAGGGTTCCTCTTC         | 25758EL | RSDALST  | ASSNRKT  | QSSDLSR  | TSANLSR  | RSDLTSE  | TSANLSR  |
| CTTATTgAGCATCCGGATCctatc <u>TATGATCCCAAGGAGAAG</u> | 25766KK | RSDNLSV  | RSANLTR  | RSDNLSV  | IRSTLRD  | TSGNLTR  | NRGNLVT  |
| GAATAAcTCGTAGGCCTAGgatagATACTAGGGTTCCTCTTC         | 25760EL | RSDALST  | ASSNRKT  | QSSDLSR  | TSANLSR  | RSDLTSE  | TSANLSR  |
| CTTATTgAGCATCCGGATCctatc <u>TATGATCCCAAGGAGAAG</u> | 25766KK | RSDNLSV  | RSANLTR  | RSDNLSV  | IRSTLRD  | TSGNLTR  | NRGNLVT  |
| GAATAAcTCGTAGGCCTAGgatagATACTAGGGTTCCTCTTC         | 25763EL | RSDALST  | ASSNRKT  | QSSDLSR  | TSANLSR  | RSDTSE   | TNSNRKR  |

Noggin ZFN-binding site: genomic sequence of noggin with ZFN-binding sites underlined. ZFN: ZFN pairs that target the corresponding noggin sequence. Fingers 1–6: amino acid sequence of zinc-finger recognition helices for each ZFN.

## Other Supporting Information Files

[SI Appendix \(DOC\)](#)
